# Supplementary material for: Brief communication: The Khurdopin glacier surge revisited – extreme flow velocities and formation of a dammed lake in 2017
Source: Copernicus journal article supplement (doi:10.5194/tc-12-95-2018), 2018-01-11
Supplement: Supplementary file [file tc-12-95-2018-supplement-title-page.pdf › tc-12-95-2018-supplement-title-page.pdf]

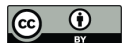

## *Supplement of*

# **Brief communication: The Khurdopin glacier surge revisited – extreme flow velocities and formation of a dammed lake in 2017**

**Jakob F. Steiner et al.**

*Correspondence to:* Jakob F. Steiner ([j.f.steiner@uu.nl](mailto:j.f.steiner@uu.nl))

- [tc-12-95-2018-supplement-title-page.pdf](#)
- [Khurdopin\\_GIF.gif](#)
- [Supplementary Material \\_ Final Version.docx](#)

The copyright of individual parts of the supplement might differ from the CC BY 4.0 License.
